# Supplementary material for: Eco-benign PVA/aluminum phosphate as an alternative to formaldehyde-based adhesives in wood-based panels
Source: Royal Society of Chemistry journal article supplement (doi:10.1039/d1ra05552f), 2021-01-01
Supplement: d1ra05552f1.pdf [file d1ra05552f1.pdf]

**Supplementary information for**

**Eco-benign PVA/aluminum phosphate adhesives as  
formaldehyde alternative in wood-based panel**

Zhenzeng Wu,<sup>a,\*</sup> Tingjie Chen,<sup>b</sup> John Tosin Aladejana,<sup>c</sup> Zhutao Zhang,<sup>a</sup> Shengwei  
Liang,<sup>a</sup> Yuanjiao Xiao,<sup>a</sup> Jiahui Lin,<sup>a</sup> Xiaodong(Alice) Wang,<sup>d</sup> and Yongqun Xie<sup>c,\*</sup>

<sup>a</sup> The College of Ecology and Resource Engineering, Wuyi University, No. 16, Wuyi  
Avenue, Wuyishan City, Fujian 354300, P.R. China

<sup>b</sup> The College of Materials Science and Engineering, Fujian University of Technology,  
Fuzhou, Fujian 350002, P.R. China

<sup>c</sup> The College of Material Engineering, Fujian Agriculture and Forestry University, 15  
Shangxiadian Road, Fuzhou, Fujian 350002, P.R. China

<sup>d</sup> The Department of Wood and Forest Sciences, Laval University, Quebec G1V 0A6,  
Canada

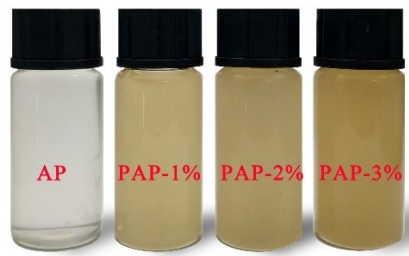

Figure S1. Digital images of AP, PAP-1%, PAP-2% and PAP-3%

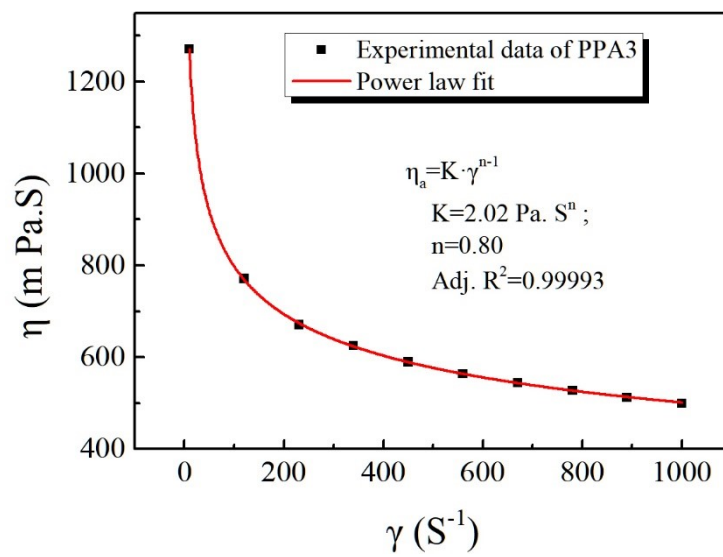

Figure S2. Experimental data and Power law fit of PAP-3 in viscosity versus velocity

gradient

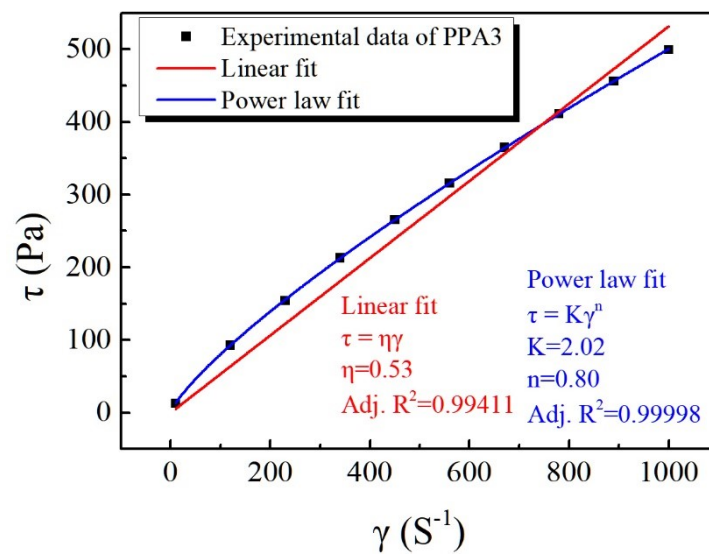

**Figure S3.** Experimental data and different fit modes of PAP-3 in shearing stress versus velocity gradient

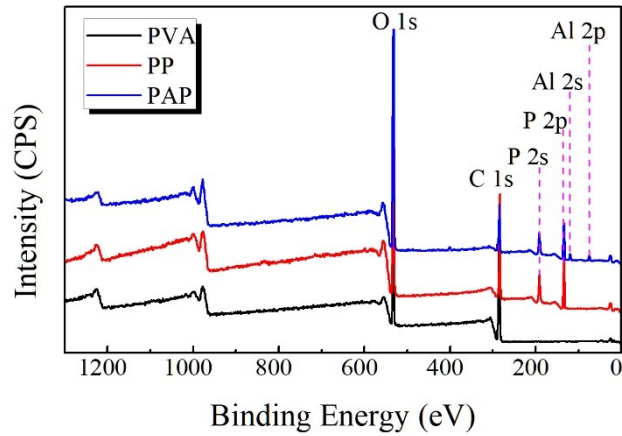

**Figure S4.** XPS survey spectra of PVA, PP and PAP

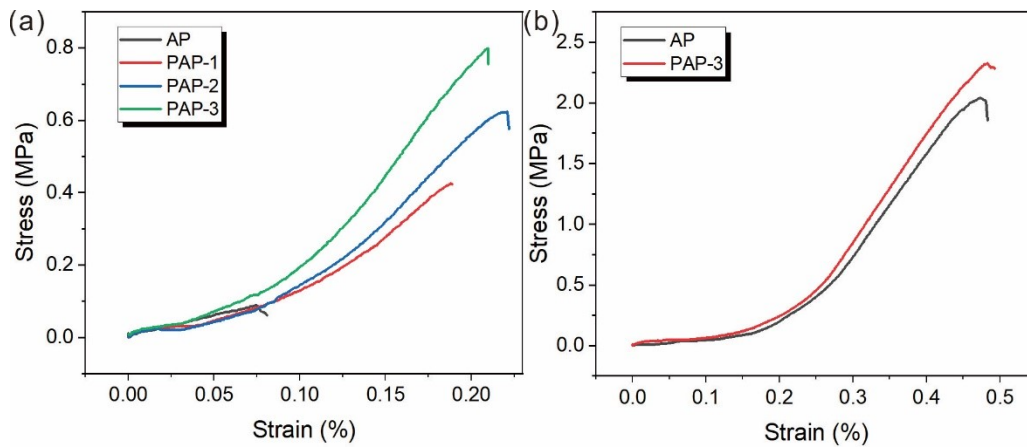

**Figure S5.** Stress vs strain curves of AP and PAP: (a) wet and (b) dry bonding strength tests

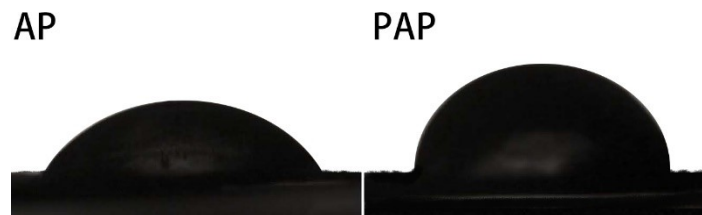

**Figure S6.** Contact angle tests of AP and PAP

**Table S1.** The viscosity value obtained by linear fitting from Figure 3(b)

| Viscosity           | AP       | PAP-1%   | PAP-2%  |
|---------------------|----------|----------|---------|
| $\eta$ (Pa)         | 0.02     | 0.05     | 0.20    |
| Adj. R <sup>2</sup> | 0.999987 | 0.999997 | 0.99982 |

**Table S2.** Details of linear and power law fit of PAP-3

| Linear fit |         |       |         | Power law fit |         |      |        |
|------------|---------|-------|---------|---------------|---------|------|--------|
| Equation   | Adj. R2 | a     | b       | Equation      | Adj. R2 | a    | b      |
| $Y=a+b*x$  | 0.99172 | 35.94 | 0.48027 | $Y=a*x^b$     | 0.99998 | 2.06 | 0.7951 |

**Table S3.** Viscosity at Room Temperature ( $\eta_{RT}$ ) and the Maximum Viscosity at  $T_{max}(\eta_{max})$  of AP, PAP-1, PAP-2 and PAP-3.

| Sample                | AP    | PAP-1  | PAP-2  | PAP-3  |
|-----------------------|-------|--------|--------|--------|
| $\eta_{RT}$ (m Pa·S)  | 31.3  | 320.0  | 347.1  | 791.6  |
| $\eta_{max}$ (m Pa·S) | 1445  | 919615 | 679990 | 455422 |
| Tmax (°C)             | 163.5 | 166.2  | 176.8  | 185.6  |

**Table S4.** Onset temperature (OT), peak temperature of thermal decomposition (PT), and the residual weight (RW) of different AP adhesives

| Sample | OT (°C) | PT1 (°C) | PT2 (°C) | PT3 (°C) | RW (%) |
|--------|---------|----------|----------|----------|--------|
| AP     | 121     | 148      | 158      | 171      | 65.25% |

|        |     |     |     |     |        |
|--------|-----|-----|-----|-----|--------|
| PAP-1% | 116 | 133 | 153 | 193 | 65.13% |
| PAP-2% | 120 | 145 | 160 | 193 | 67.62% |
| PAP-3% | 129 | 154 | 177 | 227 | 68.32% |

**Table S5.** Onset temperature (OT), peak temperature of thermal decomposition (PT), and the residual weight (RW) of W, PVA and wood-based samples

| Sample | OT (°C) | PT1 (°C) | PT2 (°C) | RW (%) |
|--------|---------|----------|----------|--------|
| W      | 303.8   | 340.2    | 502.2    | 4.85%  |
| PVA    | 210.0   | 321.4    | 417.9    | 2.72%  |
| APW    | 267.5   | 301.7    | 516.6    | 10.52% |
| PAPW   | 287.4   | 287.4    | 542.0    | 18.89% |
